# Supplementary material
Source: Springer Nature journal article supplement (https://www.springermedizin.de/resource/supplementary/12890_2009_174_MOESM1_ESM.pdf/9504712)

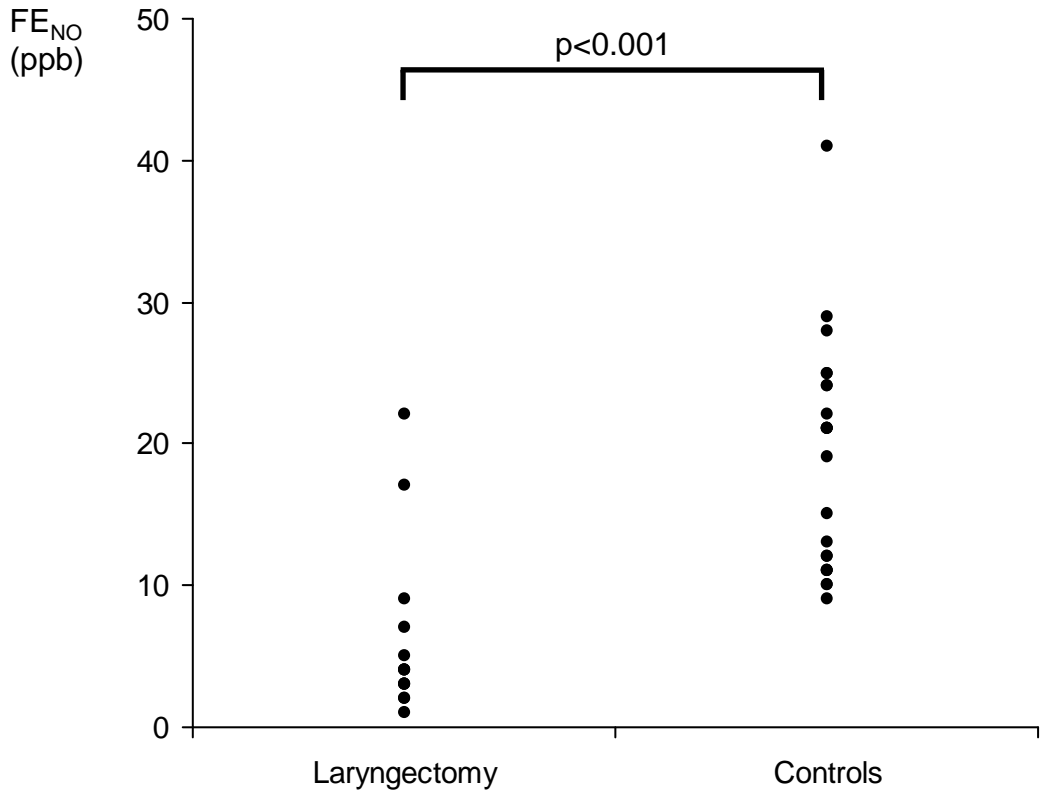

Supplement: MOESM1 [file 9504712]
